# Supplementary material
Source: MDPI journal article supplement (https://www.mdpi.com/2312-7481/7/6/87)
Supplement: s1 [file s1]

# Supplementary Materials: Chiral Radical Cation Salts of Me-EDT-TTF and DM-EDT-TTF with Octahedral, Linear and Tetrahedral Monoanions <sup>†</sup>

Nabil Mroweh <sup>1</sup>, Alexandra Bogdan <sup>1</sup>, Flavia Pop <sup>1</sup>, Pascale Auban-Senzier <sup>2</sup>, Nicolas Vanthuyne <sup>3</sup>, Elsa B. Lopes <sup>4</sup>, Manuel Almeida <sup>4</sup> and Narcis Avarvari <sup>1,\*</sup>

<sup>1</sup> Univ Angers, CNRS, MOLTECH-Anjou, SFR MATRIX, F-49000 Angers, France; nabil.mroweh@cea.fr (N.M.); alexandra.bogdan@etud.univ-angers.fr (A.B.); flavia.pop@univ-angers.fr (F.P.)

<sup>2</sup> Laboratoire de Physique des Solides, Université Paris-Saclay CNRS UMR 8502, Bât. 510, 91405 Orsay, France; pascale.senzier@universite-paris-saclay.fr

<sup>3</sup> Aix Marseille Université, CNRS, Centrale Marseille, iSm2, 13013 Marseille, France; nicolas.vanthuyne@univ-amu.fr

<sup>4</sup> Centro de Ciencias e Tecnologias Nucleares (C<sup>2</sup>TN) and Departamento de Engenharia e Ciencias Nucleares (DECN), Instituto Superior Técnico (IST), Universidade de Lisboa, E.N. 10, 2695-066 Bobadela LRS, Portugal; eblopes@ctn.tecnico.ulisboa.pt (E.B.L.); malmeida@ctn.tecnico.ulisboa.pt (M.A.)

\* Correspondence: narcis.avarvari@univ-angers.fr; Tel.: +33-2-4173-5084

<sup>†</sup> Dedicated to the memory of Professor Peter Day.

## Single crystal X-ray crystallography

**Table S1.** Crystal Data and Structure Refinement for [(*rac*)-1]<sub>2</sub>AsF<sub>6</sub>, [(*S*)-1]<sub>2</sub>AsF<sub>6</sub> and [(*R*)-1]<sub>2</sub>AsF<sub>6</sub>.

|                                                                         | [( <i>rac</i> )-1] <sub>2</sub> AsF <sub>6</sub>                 | [( <i>S</i> )-1] <sub>2</sub> AsF <sub>6</sub>                   | [( <i>R</i> )-1] <sub>2</sub> AsF <sub>6</sub>                   |
|-------------------------------------------------------------------------|------------------------------------------------------------------|------------------------------------------------------------------|------------------------------------------------------------------|
| formula                                                                 | C <sub>18</sub> H <sub>16</sub> AsF <sub>6</sub> S <sub>12</sub> | C <sub>18</sub> H <sub>16</sub> AsF <sub>6</sub> S <sub>12</sub> | C <sub>18</sub> H <sub>16</sub> AsF <sub>6</sub> S <sub>12</sub> |
| <i>M</i> [g mol <sup>−1</sup> ]                                         | 805.95                                                           | 805.95                                                           | 805.95                                                           |
| <i>T</i> [K]                                                            | 150.01(10)                                                       | 293(2)                                                           | 149.9(5)                                                         |
| crystal system                                                          | Triclinic                                                        | Triclinic                                                        | Triclinic                                                        |
| space group                                                             | <i>P</i> −1                                                      | <i>P</i> 1                                                       | <i>P</i> 1                                                       |
| <i>a</i> [Å]                                                            | 6.6856(4)                                                        | 6.6936(2)                                                        | 6.690(5)                                                         |
| <i>b</i> [Å]                                                            | 13.4236(7)                                                       | 8.4895(3)                                                        | 8.486(5)                                                         |
| <i>c</i> [Å]                                                            | 8.4692(4)                                                        | 13.4079(5)                                                       | 13.366(5)                                                        |
| <i>α</i> [°]                                                            | 92.809(4)                                                        | 92.746(3)                                                        | 92.550(5)                                                        |
| <i>β</i> [°]                                                            | 90.048(4)                                                        | 90.233(3)                                                        | 90.285(5)                                                        |
| <i>γ</i> [°]                                                            | 113.180(4)                                                       | 113.000(3)                                                       | 112.966(5)                                                       |
| <i>V</i> [Å <sup>3</sup> ]                                              | 697.70(7)                                                        | 700.32(4)                                                        | 697.8(7)                                                         |
| <i>Z</i>                                                                | 1                                                                | 1                                                                | 1                                                                |
| <i>ρ</i> <sub>calcd</sub> [g/cm <sup>3</sup> ]                          | 1.918                                                            | 1.911                                                            | 1.918                                                            |
| <i>μ</i> [mm <sup>−1</sup> ]                                            | 10.541                                                           | 10.502                                                           | 10.540                                                           |
| Flack parameter                                                         | −                                                                | 0.14(4)                                                          | 0.490(13)                                                        |
| goodness-of-fit on <i>F</i> <sup>2</sup>                                | 1.044                                                            | 1.102                                                            | 1.093                                                            |
| final <sup>a</sup> <i>R</i> 1/ <i>wR</i> 2 [ <i>I</i> > 2σ( <i>I</i> )] | 0.0322/ 0.0838                                                   | 0.0436/ 0.1197                                                   | 0.0947/ 0.2447                                                   |
| <i>R</i> 1/ <i>wR</i> 2 (all data)                                      | 0.0336/ 1.044                                                    | 0.0443/ 0.1226                                                   | 0.0953/ 0.2451                                                   |
| CCDC number                                                             | 2085699                                                          | 2085700                                                          | 2085701                                                          |

<sup>a</sup>  $R(F) = \sum ||F_o| - |F_c|| / \sum |F_o|$ ;  $wR(F^2) = [\sum [w(F_o^2 - F_c^2)^2] / \sum [w(F_o^2)^2]]^{1/2}$

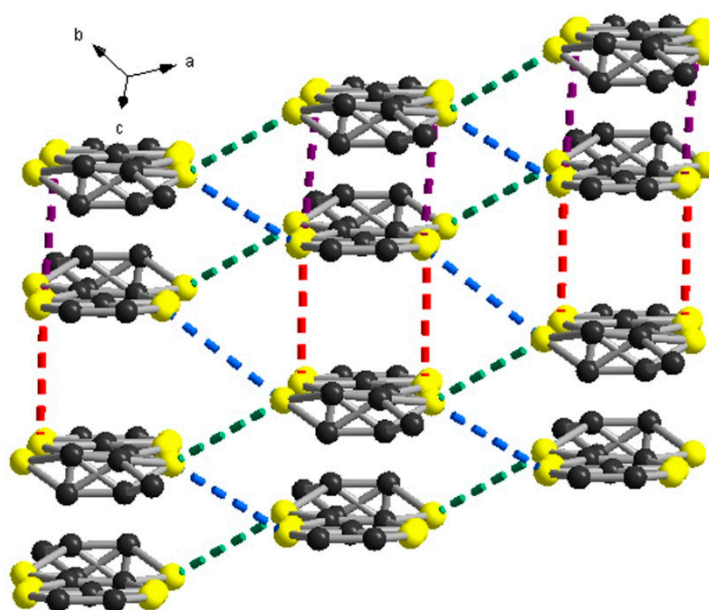

**Figure S1.** Layer of donors in the packing of  $[(rac)\text{-}1]_2\text{AsF}_6$  with an emphasis on the S...S short contacts: red dotted lines (3.58 Å), purple dotted lines (3.61 Å), blue dotted lines (3.59–3.66 Å) and green dotted lines (3.65 Å).

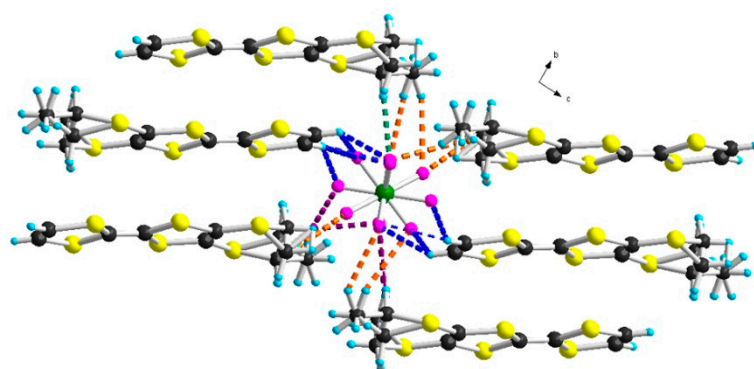

**Figure S2.** C–H...F short contacts in the packing of  $[(rac)\text{-}1]_2\text{AsF}_6$  (see Table S2).

**Table S2.** C–H...F hydrogen bonding distances (Å) and angles in [(*rac*)-1]<sub>2</sub>AsF<sub>6</sub>.

| [( <i>rac</i> )-1] <sub>2</sub> AsF <sub>6</sub> |            |             |             |            |
|--------------------------------------------------|------------|-------------|-------------|------------|
| type                                             | C–H–F      | d (H–F) Å   | d(C–F) Å    | <(C–H–F) ° |
| CH <sub>vinyl</sub>                              | C2–H2–F7   | 2.5832(27)  | 3.3915(48)  | 145.60°    |
|                                                  | C1–H1–F6B  | 2.4605(129) | 2.9989(141) | 116.95°    |
| CH <sub>2</sub>                                  | C8B–H8D–F7 | 2.4600(29)  | 3.4165(105) | 168.77°    |
| CH <sub>3</sub>                                  | C9–H9C–F5A | 2.4460(53)  | 3.3998(79)  | 172.17°    |
|                                                  | C9–H9E–F5A | 2.6560(51)  | 3.3998(79)  | 134.62°    |
|                                                  | C9–H9D–F5  | 2.6352(81)  | 3.1301(93)  | 112.42°    |
| CH                                               | C7B–H7B–F7 | 2.4301(30)  | 3.3458(131) | 155.14°    |

**Table S3.** C–H...F hydrogen bonding distances (Å) and angles in [(*S*)-1]<sub>2</sub>AsF<sub>6</sub>.

| [( <i>S</i> )-1] <sub>2</sub> AsF <sub>6</sub> |             |             |             |            |
|------------------------------------------------|-------------|-------------|-------------|------------|
| type                                           | C–H–F       | d (H–F) Å   | d(C–F) Å    | <(C–H–F) ° |
| CH <sub>vinyl</sub>                            | C1A–H1A–F1  | 2.4476(92)  | 3.240(13)   | 143.22°    |
|                                                | C2B–H2B–F4B | 2.4035(83)  | 3.172(13)   | 139.92°    |
|                                                | C2B–F5–H2B  | 2.6102(55)  | 3.4119(11)  | 144.74°    |
| CH <sub>2</sub>                                | C8A–H8A–F4B | 2.4970(76)  | 3.0937(96)  | 119.67°    |
| CH <sub>3</sub>                                | C9A–H9A–F4A | 2.4246(155) | 3.0948(209) | 126.58°    |
|                                                | C9B–H9B–F1  | 2.5534(70)  | 3.4288(111) | 151.61°    |
| CH                                             | C7A–H7A–F5  | 2.5367(64)  | 3.4622(97)  | 157.60°    |

**Table S4.** Crystal Data and Structure Refinement for [(*S*)-1]AsF<sub>6</sub>·C<sub>4</sub>H<sub>8</sub>O and [(*R*)-1]AsF<sub>6</sub>·C<sub>4</sub>H<sub>8</sub>O.

|                                                                         | [( <i>S</i> )-1]AsF <sub>6</sub> ·C <sub>4</sub> H <sub>8</sub> O | [( <i>R</i> )-1]AsF <sub>6</sub> ·C <sub>4</sub> H <sub>8</sub> O |
|-------------------------------------------------------------------------|-------------------------------------------------------------------|-------------------------------------------------------------------|
| Formula                                                                 | C <sub>13</sub> H <sub>16</sub> AsF <sub>6</sub> OS <sub>6</sub>  | C <sub>13</sub> H <sub>16</sub> AsF <sub>6</sub> OS <sub>6</sub>  |
| <i>M</i> [g mol <sup>−1</sup> ]                                         | 569.54                                                            | 569.54                                                            |
| <i>T</i> [K]                                                            | 200.01(10)                                                        | 150.00(10)                                                        |
| Crystal system                                                          | triclinic                                                         | triclinic                                                         |
| Space group                                                             | <i>P</i> 1                                                        | <i>P</i> 1                                                        |
| <i>a</i> [Å]                                                            | 8.0199(2)                                                         | 7.9786(2)                                                         |
| <i>b</i> [Å]                                                            | 9.0833(3)                                                         | 9.0196(3)                                                         |
| <i>c</i> [Å]                                                            | 15.2242(4)                                                        | 15.2555(5)                                                        |
| $\alpha$ [°]                                                            | 103.145(2)                                                        | 103.368(3)                                                        |
| $\beta$ [°]                                                             | 101.063(2)                                                        | 100.887(2)                                                        |
| $\gamma$ [°]                                                            | 100.814(2)                                                        | 100.873(2)                                                        |
| <i>V</i> [Å <sup>3</sup> ]                                              | 1028.41(5)                                                        | 1017.40(6)                                                        |
| <i>Z</i>                                                                | 2                                                                 | 2                                                                 |
| $\rho_{\text{calcd}}$ [g/cm <sup>3</sup> ]                              | 1.839                                                             | 1.859                                                             |
| $\mu$ [mm <sup>−1</sup> ]                                               | 8.475                                                             | 8.567                                                             |
| Flack parameter                                                         | 0.06(5)                                                           | 0.05(5)                                                           |
| goodness-of-fit on <i>F</i> <sup>2</sup>                                | 1.067                                                             | 1.034                                                             |
| final <sup>a</sup> <i>R</i> 1/ <i>wR</i> 2 [ <i>I</i> > 2σ( <i>I</i> )] | 0.0427/ 0.1126                                                    | 0.0418/ 0.1050                                                    |
| <i>R</i> 1/ <i>wR</i> 2 (all data)                                      | 0.0444/ 0.1144                                                    | 0.0440/ 0.1069                                                    |
| CCDC number                                                             | 2085702                                                           | 2085703                                                           |

<sup>a</sup>  $R(F) = \sum ||F_o| - |F_c|| / \sum |F_o|$ ;  $wR(F^2) = [\sum [w(F_o^2 - F_c^2)^2] / \sum [w(F_o^2)^2]]^{1/2}$

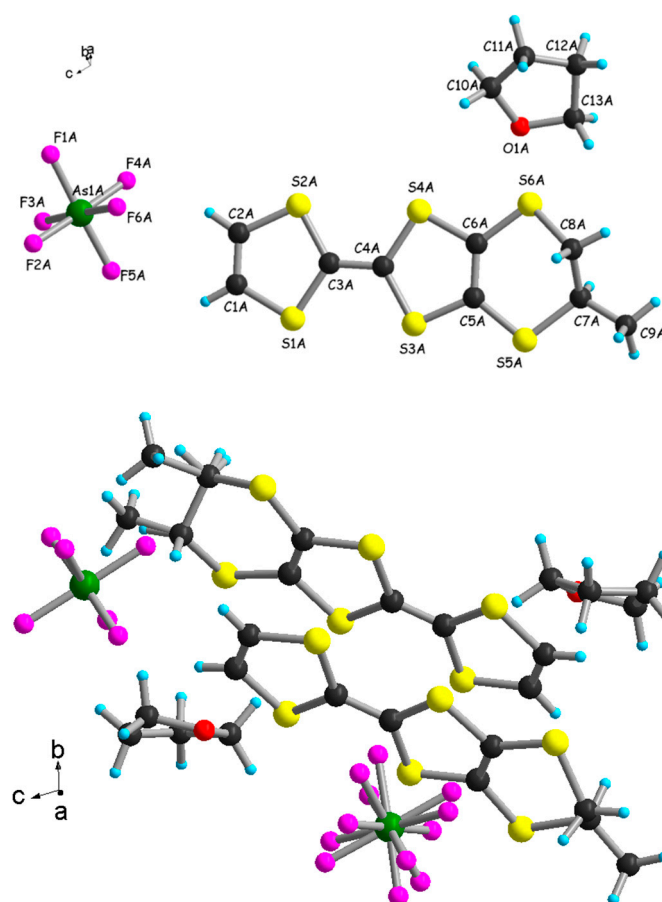

**Figure S3.** View of the ordered donor molecule and anion in the crystal structure of [(*R*)-1]AsF<sub>6</sub>·C<sub>4</sub>H<sub>8</sub>O (top); Molecular structure of [(*R*)-1]AsF<sub>6</sub>·C<sub>4</sub>H<sub>8</sub>O. C9B atom is disordered over two positions A (s.o.f. 0.72) and B (s.o.f. 0.28). F1B-F6B atoms are disordered over two positions A (s.o.f. 0.51) and B (s.o.f. 0.49) (bottom).

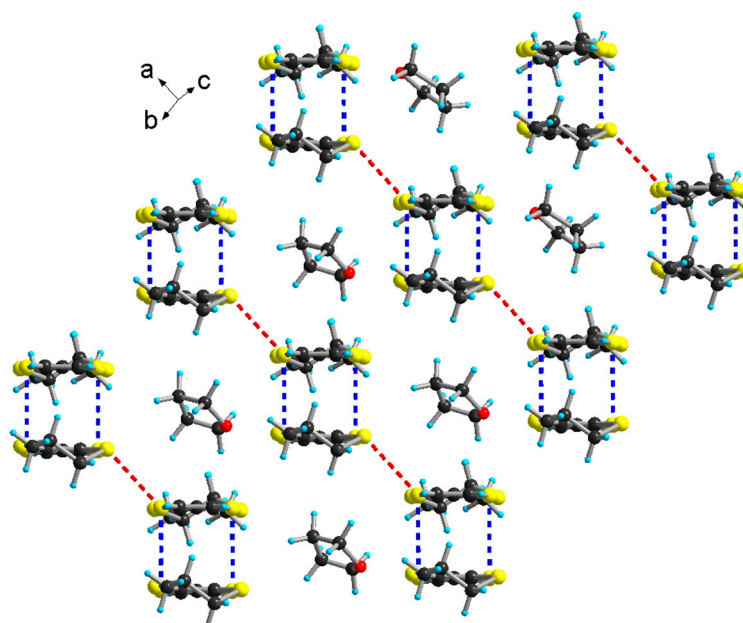

**Figure S4.** Packing of the donors in the structure of [(*S*)-1]AsF<sub>6</sub>·C<sub>4</sub>H<sub>8</sub>O with emphasis on the S...S short contacts: blue dotted lines for (3.33 – 3.37 Å), red dotted lines for (3.59 – 3.66 Å). THF molecules are also shown.

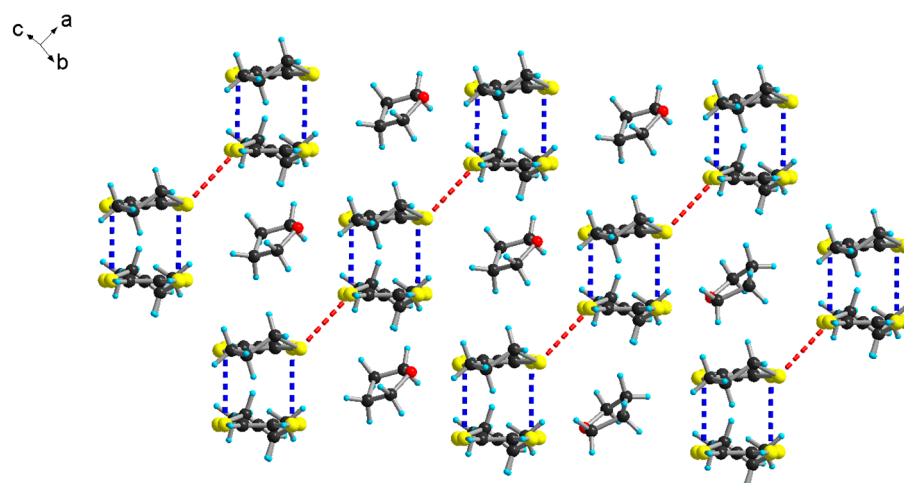

**Figure S5.** Packing of the donors in the structure of [(R)-1]AsF<sub>6</sub>·C<sub>4</sub>H<sub>8</sub>O with emphasis on the S...S short contacts: blue dotted lines for (3.31 – 3.37 Å), red dotted lines for (3.58 – 3.63 Å). THF molecules are also shown.

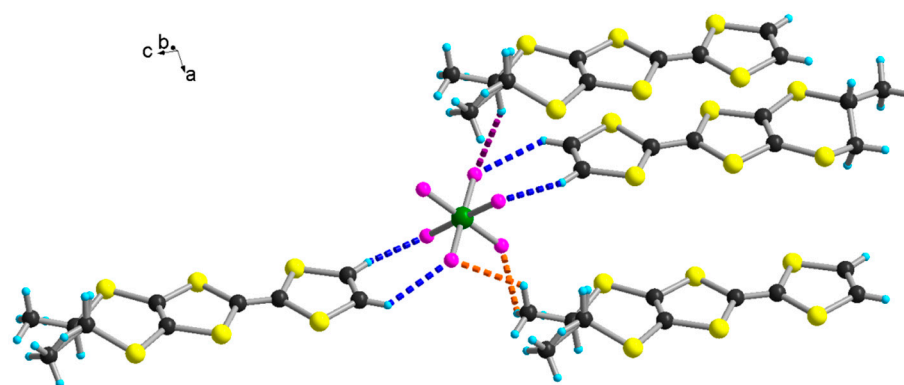

**Figure S6.** View of the structure of [(R)-1]AsF<sub>6</sub>·C<sub>4</sub>H<sub>8</sub>O with an emphasis on the C–H...F short contacts: blue dotted lines for CH<sub>vinyl</sub> (2.41 – 2.62 Å), orange dotted lines for Me (2.59 – 2.62 Å), violet dotted line for CH (2.65 Å).

**Table S5.** C–H...F hydrogen bonding distances (Å) and angles in [(S)-1]AsF<sub>6</sub>·C<sub>4</sub>H<sub>8</sub>O.

| [(S)-1]AsF <sub>6</sub> ·C <sub>4</sub> H <sub>8</sub> O |               |                  |                  |               |
|----------------------------------------------------------|---------------|------------------|------------------|---------------|
| type                                                     | C–H–F         | <i>d</i> (H–F) Å | <i>d</i> (C–F) Å | <(C–H–F) °    |
| CH <sub>vinyl</sub>                                      | C1A–H1A–F3A   | 2.6243(82)       | 3.3354(126)      | 133.660(671)  |
|                                                          | C2A–H2A–F4A   | 2.4045(81)       | 3.3141(118)      | 165.769(706)  |
|                                                          | C1B–H1B–F2A   | 2.4132(85)       | 3.3357(130)      | 171.626(715)  |
|                                                          | C2B–H2B–F1A   | 2.6367(76)       | 3.2539(12)       | 124.394(656)  |
| CH                                                       | C7B–H7BA–F3A  | 2.6544(105)      | 3.5174(190)      | 147.960(926)  |
| CH <sub>2</sub> (THF)                                    | C12A–H12A–F5A | 2.6644(100)      | 3.5232(208)      | 147.387(1095) |
| CH <sub>3</sub>                                          | C9BA–H9BA–F1A | 2.5907(100)      | 3.0595(256)      | 110.453(1273) |
|                                                          | C9BA–H9BB–F6A | 2.6216(126)      | 3.2682(256)      | 124.925(1271) |

**Table S6.** C–H...F hydrogen bonding distances (Å) and angles in [(R)-1]AsF<sub>6</sub>·C<sub>4</sub>H<sub>8</sub>O.

| [(R)-1]AsF <sub>6</sub> ·C <sub>4</sub> H <sub>8</sub> O |       |                  |                  |            |
|----------------------------------------------------------|-------|------------------|------------------|------------|
| type                                                     | C–H–F | <i>d</i> (H–F) Å | <i>d</i> (C–F) Å | <(C–H–F) ° |

|                            |                      |             |             |               |
|----------------------------|----------------------|-------------|-------------|---------------|
| <i>CH</i> <sub>vinyl</sub> | <i>C1A—H1A—F5A</i>   | 2.5610(84)  | 3.2645(130) | 132.794(671)  |
|                            | <i>C2A—H2A—F4A</i>   | 2.4001(80)  | 3.3070(129) | 164.947(779)  |
|                            | <i>C1B—H1B—F2A</i>   | 2.3966(79)  | 3.3183(117) | 171.163(687)  |
|                            | <i>C2B—H2B—F1A</i>   | 2.6133(83)  | 3.2453(126) | 125.717(670)  |
| <i>CH</i>                  | <i>C7B—H7BB—F5A</i>  | 2.6496(110) | 3.5030(194) | 146.915(931)  |
| <i>CH</i> <sub>3</sub>     | <i>C9BA—H9BA—F1A</i> | 2.5842(114) | 3.0055(254) | 106.945(1187) |
|                            | <i>C9BA—H9BC—F6A</i> | 2.6127(109) | 3.2496(243) | 123.904(1234) |

Table S7. Crystal Data and Structure Refinement for [(*rac*)-1]I<sub>3</sub>, [(*S*)-1]I<sub>3</sub> and [(*R*)-1]I<sub>3</sub>.

|                                                                         | [( <i>rac</i> )-1]I <sub>3</sub>                            | [( <i>S</i> )-1]I <sub>3</sub>                                 | [( <i>R</i> )-1]I <sub>3</sub>                                 |
|-------------------------------------------------------------------------|-------------------------------------------------------------|----------------------------------------------------------------|----------------------------------------------------------------|
| formula                                                                 | C <sub>9</sub> H <sub>8</sub> I <sub>3</sub> S <sub>6</sub> | C <sub>18</sub> H <sub>16</sub> I <sub>6</sub> S <sub>12</sub> | C <sub>18</sub> H <sub>16</sub> I <sub>6</sub> S <sub>12</sub> |
| <i>M</i> [g mol <sup>−1</sup> ]                                         | 689.21                                                      | 1378.43                                                        | 1378.43                                                        |
| <i>T</i> [K]                                                            | 187(50)                                                     | 286(13)                                                        | 150.01(10)                                                     |
| crystal system                                                          | Triclinic                                                   | Triclinic                                                      | Triclinic                                                      |
| space group                                                             | <i>P</i> −1                                                 | <i>P</i> 1                                                     | <i>P</i> 1                                                     |
| <i>a</i> [Å]                                                            | 8.9803(16)                                                  | 9.0826(6)                                                      | 9.023(2)                                                       |
| <i>b</i> [Å]                                                            | 9.0821(16)                                                  | 9.0886(7)                                                      | 9.045(2)                                                       |
| <i>c</i> [Å]                                                            | 12.634(2)                                                   | 12.7544(9)                                                     | 12.728(3)                                                      |
| <i>α</i> [°]                                                            | 84.646(15)                                                  | 71.788(7)                                                      | 71.75(3)                                                       |
| <i>β</i> [°]                                                            | 73.354(16)                                                  | 85.360(6)                                                      | 85.05(3)                                                       |
| <i>γ</i> [°]                                                            | 60.631(19)                                                  | 60.966(8)                                                      | 60.57(3)                                                       |
| <i>V</i> [Å <sup>3</sup> ]                                              | 859.0(3)                                                    | 871.25(13)                                                     | 856.3(4)                                                       |
| <i>Z</i>                                                                | 2                                                           | 1                                                              | 1                                                              |
| <i>ρ</i> <sub>calcd</sub> [g/cm <sup>3</sup> ]                          | 2.665                                                       | 2.627                                                          | 2.673                                                          |
| <i>μ</i> [mm <sup>−1</sup> ]                                            | 49.531                                                      | 48.834                                                         | 49.684                                                         |
| Flack parameter                                                         | −                                                           | 0.054(13)                                                      | 0.061(17)                                                      |
| goodness-of-fit on <i>F</i> <sup>2</sup>                                | 1.103                                                       | 1.062                                                          | 1.039                                                          |
| final <sup>a</sup> <i>R</i> 1/ <i>wR</i> 2 [ <i>I</i> > 2σ( <i>I</i> )] | 0.1084/ 0.2952                                              | 0.0545/0.1481                                                  | 0.0577/ 0.1606                                                 |
| <i>R</i> 1/ <i>wR</i> 2 (all data)                                      | 0.1587/ 0.3612                                              | 0.0617/0.1580                                                  | 0.0693/ 0.1705                                                 |
| CCDC number                                                             | 2085704                                                     | 2085705                                                        | 2085706                                                        |

$$^a R(F) = \Sigma ||F_o| - |F_c|| / \Sigma |F_o|; wR(F^2) = [\Sigma [w(F_o^2 - F_c^2)^2] / \Sigma [w(F_o^2)^2]]^{1/2}$$

Table S8. Selected C=C and C–S internal bond lengths for [(*S*)-1]I<sub>3</sub>.

| Bond lengths (Å) |         |           |
|------------------|---------|-----------|
| A                | C3A—C4A | 1.41(3)   |
|                  | S1A—C3A | 1.697(19) |
|                  | S2A—C3A | 1.71(2)   |
|                  | S3A—C4A | 1.723(19) |
|                  | S4A—C4A | 1.721(19) |
|                  | C4B—C3B | 1.38(3)   |
| B                | S1B—C3B | 1.74(2)   |
|                  | S2B—C3B | 1.72(2)   |
|                  | S3B—C4B | 1.713(19) |
|                  | S4B—C4B | 1.72(2)   |

Table S9. Crystal Data and Structure Refinement for [(*rac*)-2]I<sub>3</sub>, [(*S,S*)-2]I<sub>3</sub> and [(*R,R*)-2]I<sub>3</sub>.

|                                                                                  | [( <i>rac</i> )-2]I <sub>3</sub>                              | [( <i>S,S</i> )-2]I <sub>3</sub>                               | [( <i>R,R</i> )-2]I <sub>3</sub>                              |
|----------------------------------------------------------------------------------|---------------------------------------------------------------|----------------------------------------------------------------|---------------------------------------------------------------|
| formula                                                                          | C <sub>10</sub> H <sub>10</sub> S <sub>6</sub> I <sub>3</sub> | C <sub>20</sub> H <sub>20</sub> I <sub>6</sub> S <sub>12</sub> | C <sub>10</sub> H <sub>10</sub> S <sub>6</sub> I <sub>3</sub> |
| <i>M</i> [g mol <sup>−1</sup> ]                                                  | 703.24                                                        | 1406.48                                                        | 703.24                                                        |
| <i>T</i> [K]                                                                     | 293(2)                                                        | 293(2)                                                         | 293(2)                                                        |
| crystal system                                                                   | Triclinic                                                     | Triclinic                                                      | Triclinic                                                     |
| space group                                                                      | <i>P</i> −1                                                   | <i>P</i> 1                                                     | <i>P</i> 1                                                    |
| <i>a</i> [Å]                                                                     | 7.6086(2)                                                     | 7.6146(9)                                                      | 7.6112(7)                                                     |
| <i>b</i> [Å]                                                                     | 11.2297(5)                                                    | 11.2273(11)                                                    | 11.1976(6)                                                    |
| <i>c</i> [Å]                                                                     | 11.6074(4)                                                    | 11.6249(11)                                                    | 11.6449(9)                                                    |
| $\alpha$ [°]                                                                     | 72.975(3)                                                     | 73.037(9)                                                      | 73.117(5)                                                     |
| $\beta$ [°]                                                                      | 89.161(3)                                                     | 89.070(10)                                                     | 88.944(7)                                                     |
| $\gamma$ [°]                                                                     | 88.603(2)                                                     | 88.536(8)                                                      | 88.405(4)                                                     |
| <i>V</i> [Å <sup>3</sup> ]                                                       | 947.99(6)                                                     | 950.24(18)                                                     | 949.26(12)                                                    |
| <i>Z</i>                                                                         | 2                                                             | 1                                                              | 2                                                             |
| $\rho_{\text{calcd}}$ [g/cm <sup>3</sup> ]                                       | 2.464                                                         | 2.458                                                          | 2.460                                                         |
| $\mu$ [mm <sup>−1</sup> ]                                                        | 5.591                                                         | 5.578                                                          | 5.584                                                         |
| Flack parameter                                                                  | −                                                             | 0.41(10)                                                       | 0.08(4)                                                       |
| goodness-of-fit on <i>F</i> <sup>2</sup>                                         | 1.060                                                         | 1.029                                                          | 1.031                                                         |
| final <sup>a</sup> <i>R</i> 1/ <i>wR</i> 2 [ <i>I</i> > 2 $\sigma$ ( <i>I</i> )] | 0.0307 / 0.0598                                               | 0.0494 / 0.1046                                                | 0.0274 / 0.0472                                               |
| <i>R</i> 1/ <i>wR</i> 2 (all data)                                               | 0.0608 / 0.0702                                               | 0.1294 / 0.1242                                                | 0.0651 / 0.0557                                               |
| CCDC number                                                                      | 2085707                                                       | 2085708                                                        | 2085709                                                       |

<sup>a</sup>  $R(F) = \Sigma ||F_o| - |F_c|| / \Sigma |F_o|$ ;  $wR(F^2) = [\Sigma [w(F_o^2 - F_c^2)^2] / \Sigma [w(F_o^2)^2]]^{1/2}$

**Table S10.** Selected C=C and C–S internal bond lengths for (2)I<sub>3</sub>.

| Bond         | Bond lengths (Å)                 |                                  |                                  |
|--------------|----------------------------------|----------------------------------|----------------------------------|
|              | [( <i>rac</i> )-2]I <sub>3</sub> | [( <i>S,S</i> )-2]I <sub>3</sub> | [( <i>R,R</i> )-2]I <sub>3</sub> |
| <b>C3—C4</b> | 1.390(4)                         | 1.43(4), 1.38(4)                 | 1.37(3), 1.42(2)                 |
| <b>S1—C3</b> | 1.720(3)                         | 1.86(3), 1.87(3)                 | 1.72(2), 1.710(18)               |
| <b>S2—C3</b> | 1.728(3)                         | 1.57(3), 1.59(3)                 | 1.733(19), 1.738(19)             |
| <b>S3—C4</b> | 1.715(3)                         | 1.78(3), 1.83(4)                 | 1.731(18), 1.691(19)             |
| <b>S4—C4</b> | 1.724(3)                         | 1.63(3), 1.64(4)                 | 1.74(2), 1.712(18)               |

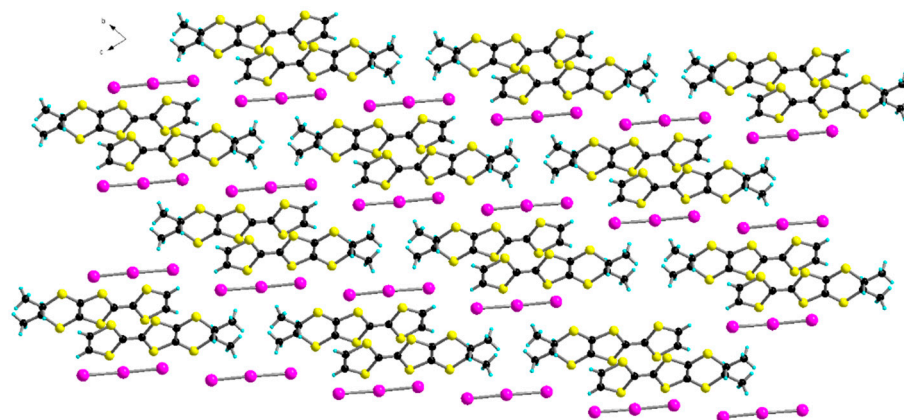

**Figure S7.** View in the *bc* plane of the packing within [(*rac*)-2]I<sub>3</sub>.



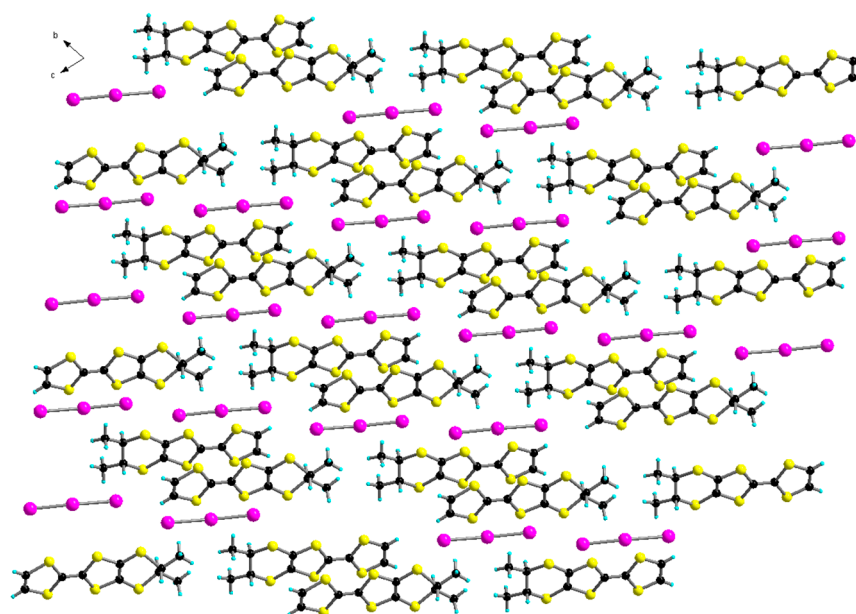

Figure S8. View in the *bc* plane of the packing within [(*R,R*)-2]I<sub>3</sub>.

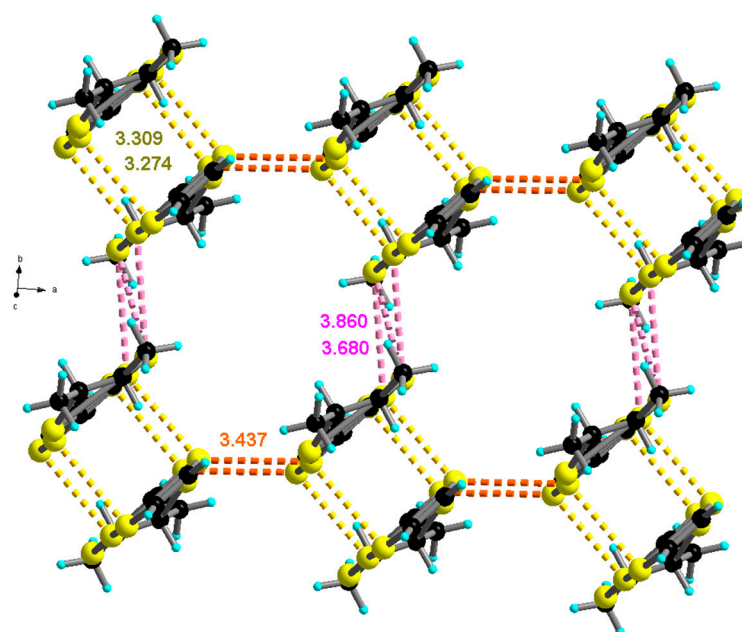

Figure S9. Packing of the donors and highlight of the S...S short contacts for [(*rac*)-2]I<sub>3</sub>. The anions are not shown.

Table S11. Crystal Data and Structure Refinement for (*meso*)-2, [(*meso*)-2]ClO<sub>4</sub>, [(*meso*)-2]PF<sub>6</sub> and [(*meso*)-2]ReO<sub>4</sub>.

|                                 | ( <i>meso</i> )-2                              | [( <i>meso</i> )-2]ClO <sub>4</sub>                             | [( <i>meso</i> )-2]PF <sub>6</sub>                             | [( <i>meso</i> )-2]ReO <sub>4</sub>                             |
|---------------------------------|------------------------------------------------|-----------------------------------------------------------------|----------------------------------------------------------------|-----------------------------------------------------------------|
| formula                         | C <sub>10</sub> H <sub>10</sub> S <sub>6</sub> | C <sub>10</sub> H <sub>10</sub> ClO <sub>4</sub> S <sub>6</sub> | C <sub>10</sub> H <sub>10</sub> F <sub>6</sub> PS <sub>6</sub> | C <sub>10</sub> H <sub>10</sub> O <sub>4</sub> ReS <sub>6</sub> |
| <i>M</i> [g mol <sup>−1</sup> ] | 322.54                                         | 421.99                                                          | 467.51                                                         | 572.74                                                          |
| <i>T</i> [K]                    | 150.00(10)                                     | 153.26(10) K                                                    | 150.00(10)                                                     | 150.00(10)                                                      |
| crystal system                  | Monoclinic                                     | Triclinic                                                       | Monoclinic                                                     | Triclinic                                                       |
| space group                     | <i>P</i> 2 <sub>1</sub> / <i>c</i>             | <i>P</i> −1                                                     | <i>P</i> 2 <sub>1</sub> / <i>n</i>                             | <i>P</i> −1                                                     |
| <i>a</i> [Å]                    | 8.4110(3)                                      | 6.4793(6)                                                       | 6.5671(2)                                                      | 6.5583(3)                                                       |



|                                                  |                |                |                |                |
|--------------------------------------------------|----------------|----------------|----------------|----------------|
| $b$ [Å]                                          | 16.6502(6)     | 10.7956(8)     | 11.1233(4)     | 10.5579(5)     |
| $c$ [Å]                                          | 9.5635(3)      | 10.8754(16)    | 22.4614(8)     | 11.4661(9)     |
| $\alpha$ [°]                                     | 90             | 92.826(9)      | 90             | 96.326(5)      |
| $\beta$ [°]                                      | 93.903(3)      | 94.844(1)      | 97.469(3)      | 96.382(5)      |
| $\gamma$ [°]                                     | 90             | 91.178(6)      | 90             | 92.742(4)      |
| $V$ [Å <sup>3</sup> ]                            | 1336.21(8)     | 756.84(14)     | 1626.84(10)    | 782.76(8)      |
| $Z$                                              | 4              | 2              | 4              | 2              |
| $\rho_{\text{calcd}}$ [g/cm <sup>3</sup> ]       | 1.603          | 1.852          | 1.909          | 2.430          |
| $\mu$ [mm <sup>-1</sup> ]                        | 9.198          | 10.090         | 9.243          | 22.776         |
| goodness-of-fit on $F^2$                         | 1.028          | 1.121          | 1.414          | 1.150          |
| final <sup>a</sup> $R1/wR2$ [ $I > 2\sigma(I)$ ] | 0.0427/ 0.1122 | 0.1434/ 0.4072 | 0.0683/ 0.1122 | 0.0594/ 0.1591 |
| $R1/wR2$ (all data)                              | 0.0514/ 0.1200 | 0.1612/ 0.4150 | 0.1039/ 0.2979 | 0.0669/ 0.1670 |
| CCDC number                                      | 2085710        | 2085711        | 2085712        | 2085713        |

$$^a R(F) = \Sigma ||F_o| - |F_c|| / \Sigma |F_o|; wR(F^2) = [\Sigma [w(F_o^2 - F_c^2)^2] / \Sigma [w(F_o^2)^2]]^{1/2}$$

**Table S12.** Selected C=C and C–S internal bond lengths for (*meso*)-2, [(*meso*)-2]ClO<sub>4</sub>, [(*meso*)-2]PF<sub>6</sub> and [(*meso*)-2]ReO<sub>4</sub>.

| bond  | Bond lengths (Å)  |                                     |                                    |                                     |
|-------|-------------------|-------------------------------------|------------------------------------|-------------------------------------|
|       | ( <i>meso</i> )-2 | [( <i>meso</i> )-2]ClO <sub>4</sub> | [( <i>meso</i> )-2]PF <sub>6</sub> | [( <i>meso</i> )-2]ReO <sub>4</sub> |
| C3–C4 | 1.339(5)          | 1.40(2)                             | 1.387(6)                           | 1.407(18)                           |
| S1–C3 | 1.750(3)          | 1.716(18)                           | 1.721(5)                           | 1.731(13)                           |
| S2–C3 | 1.763(3)          | 1.715(17)                           | 1.715(4)                           | 1.703(14)                           |
| S3–C4 | 1.758(3)          | 1.697(17)                           | 1.720(4)                           | 1.701(13)                           |
| S4–C4 | 1.759(3)          | 1.749(17)                           | 1.717(4)                           | 1.729(12)                           |

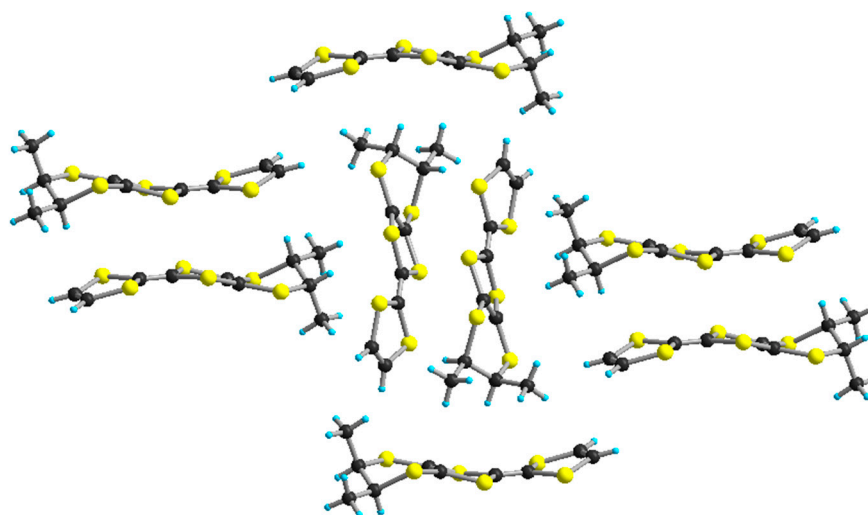

**Figure S10.** Packing diagram for (*meso*)-2.

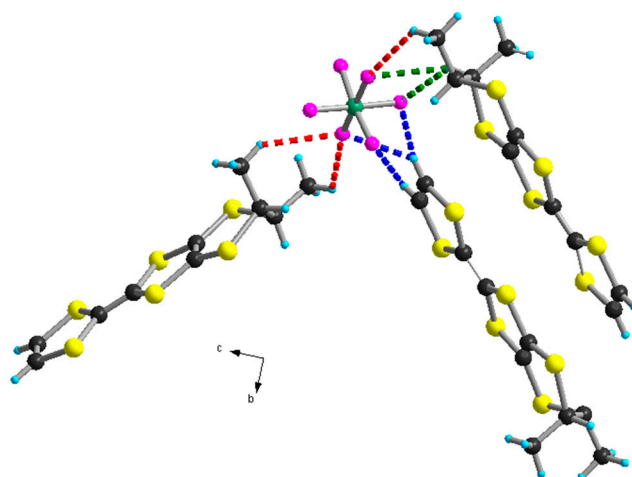

**Figure S11.** Solid state structure of [(*meso*)-2]PF<sub>6</sub> with an emphasis on the C–H...F short contacts: blue dotted lines for CH vinyl (2.32 – 2.36 Å), red dotted lines for Me (2.53 – 2.65 – 2.72 Å) and green dotted lines for H<sub>CH</sub> (2.45 – 2.65 Å).

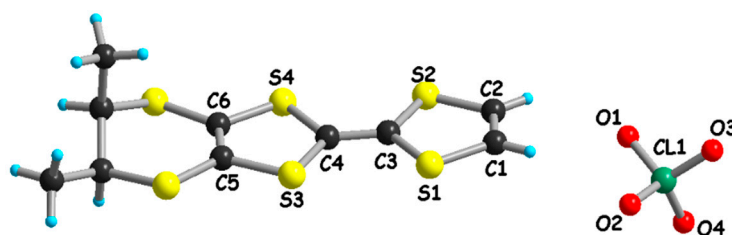

**Figure S12.** Molecular structure of [(*meso*)-2]ClO<sub>4</sub>.

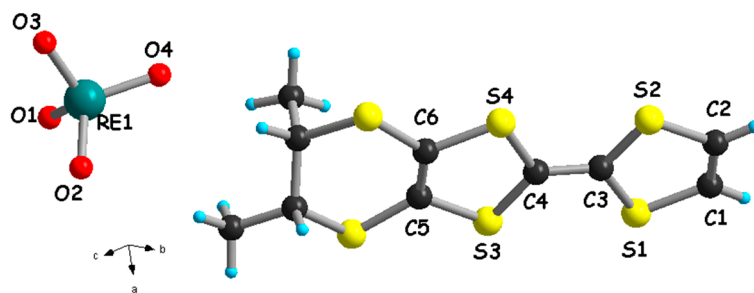

**Figure S13.** Molecular structure of [(*meso*)-2]ReO<sub>4</sub>.

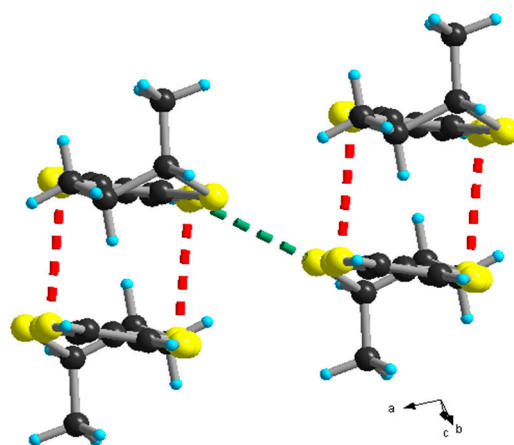

**Figure S14.** Packing diagram for  $[(\text{meso})\text{-2}]\text{ReO}_4$  with an emphasis on short S...S interactions. Red dotted lines (3.29 Å) and green dotted lines (3.37 Å).
